# Supplementary material for: Spatial and temporal patterns of dengue incidence in northeastern Thailand 2006–2016
Source: PubMed Central journal article supplement (PMC6708185; doi:10.1186/s12879-019-4379-3), 2019-08-23
Supplement: 12879_2019_4379_MOESM5_ESM.pdf [file 12879_2019_4379_MOESM5_ESM.pdf]

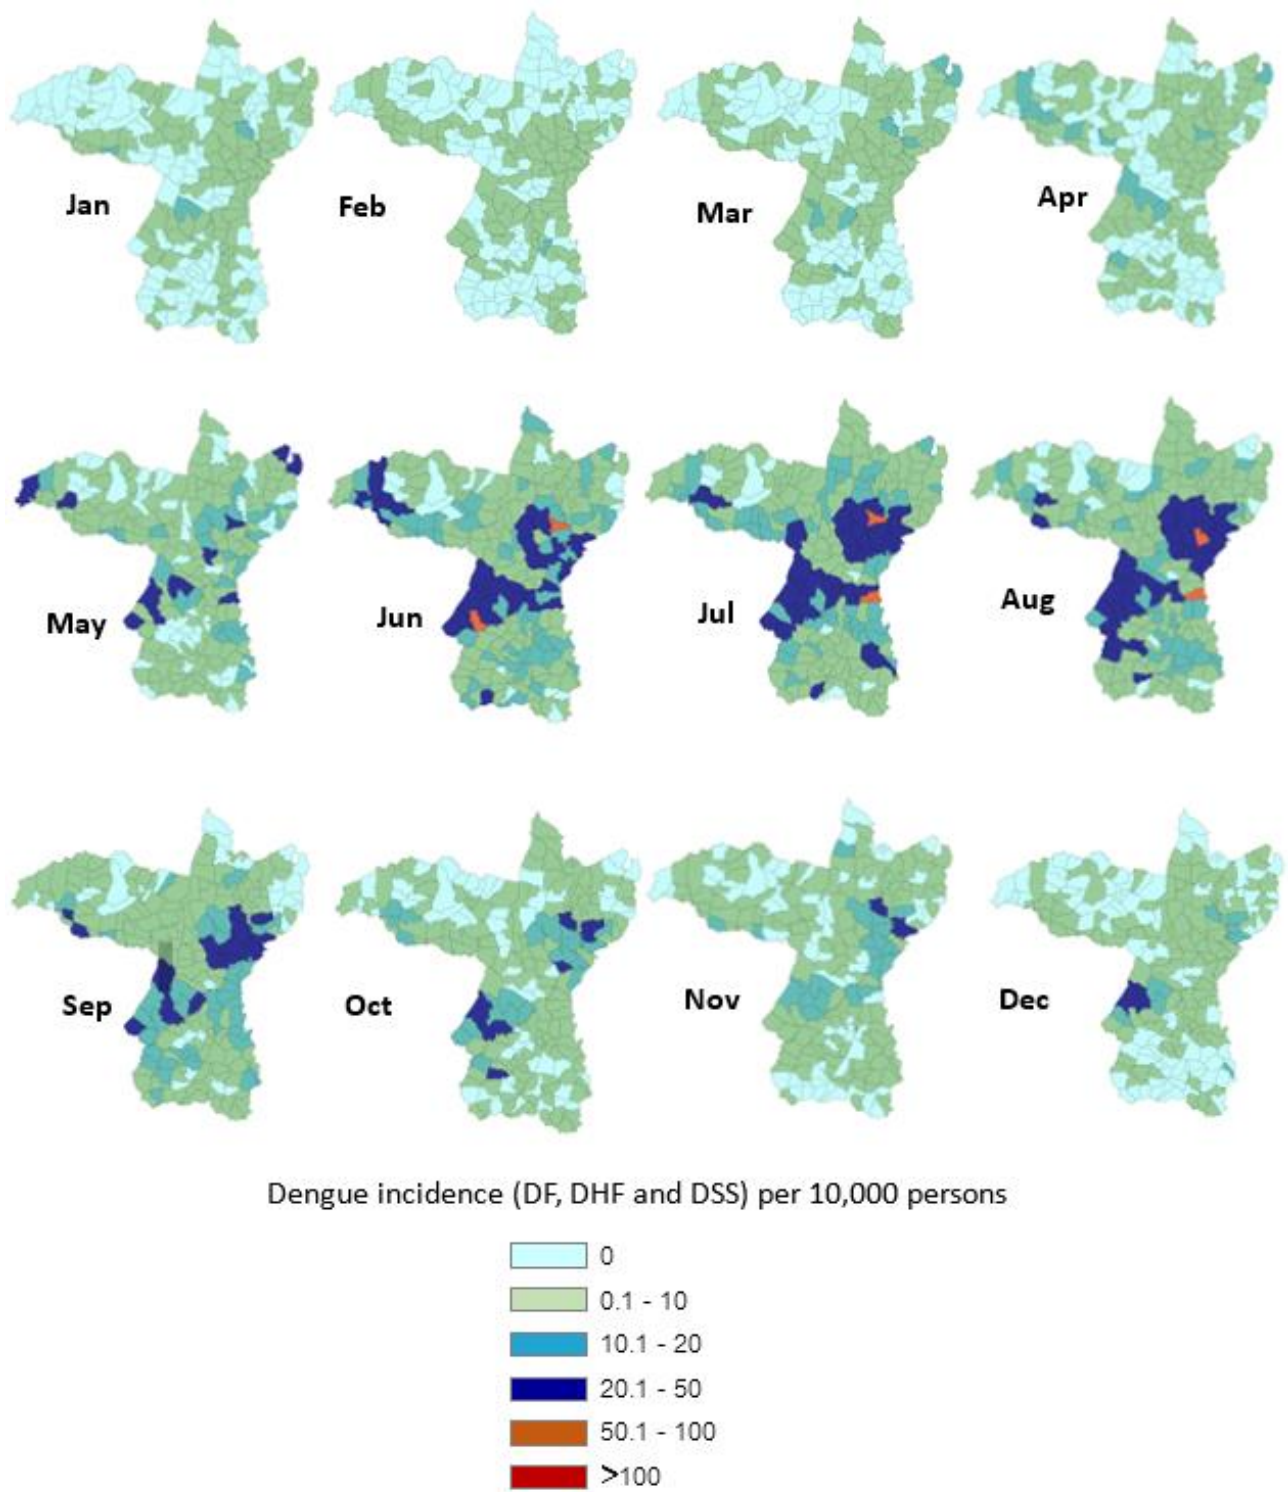

**Additional file 5.** Average monthly incidence of dengue (DF, DHF, and DSS) per 10,000 persons in Khon Kaen province, Thailand, January to December 2006-2016.
