# Supplementary material for: Spatial and temporal patterns of dengue incidence in northeastern Thailand 2006–2016
Source: Springer Nature journal article supplement (doi:10.1186/s12879-019-4379-3), 2019-08-23
Supplement: MOESM3 [file 17098744]

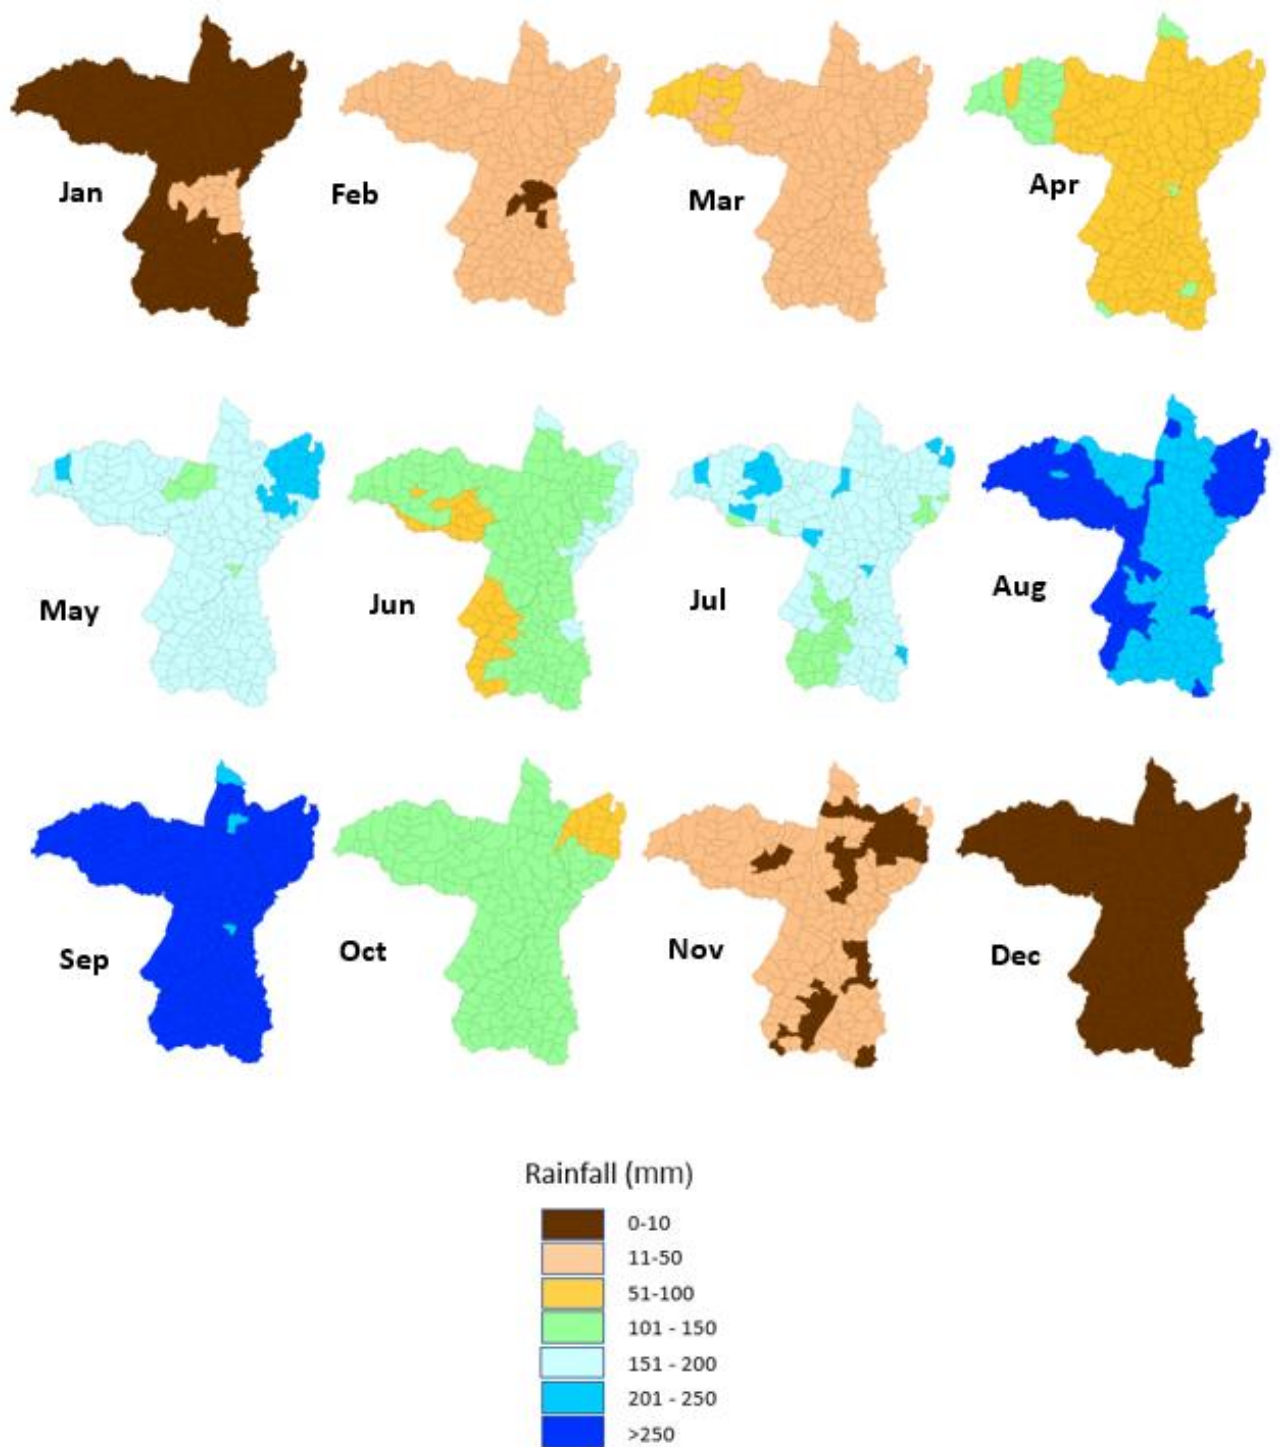

**Additional file 3.** Average monthly rainfall (mm) per sub-district, Khon Kaen province, Thailand, January to December 2006-2016.
