# Supplementary material for: Spatial and temporal patterns of dengue incidence in northeastern Thailand 2006–2016
Source: Springer Nature journal article supplement (doi:10.1186/s12879-019-4379-3), 2019-08-23
Supplement: MOESM4 [file 17098744]

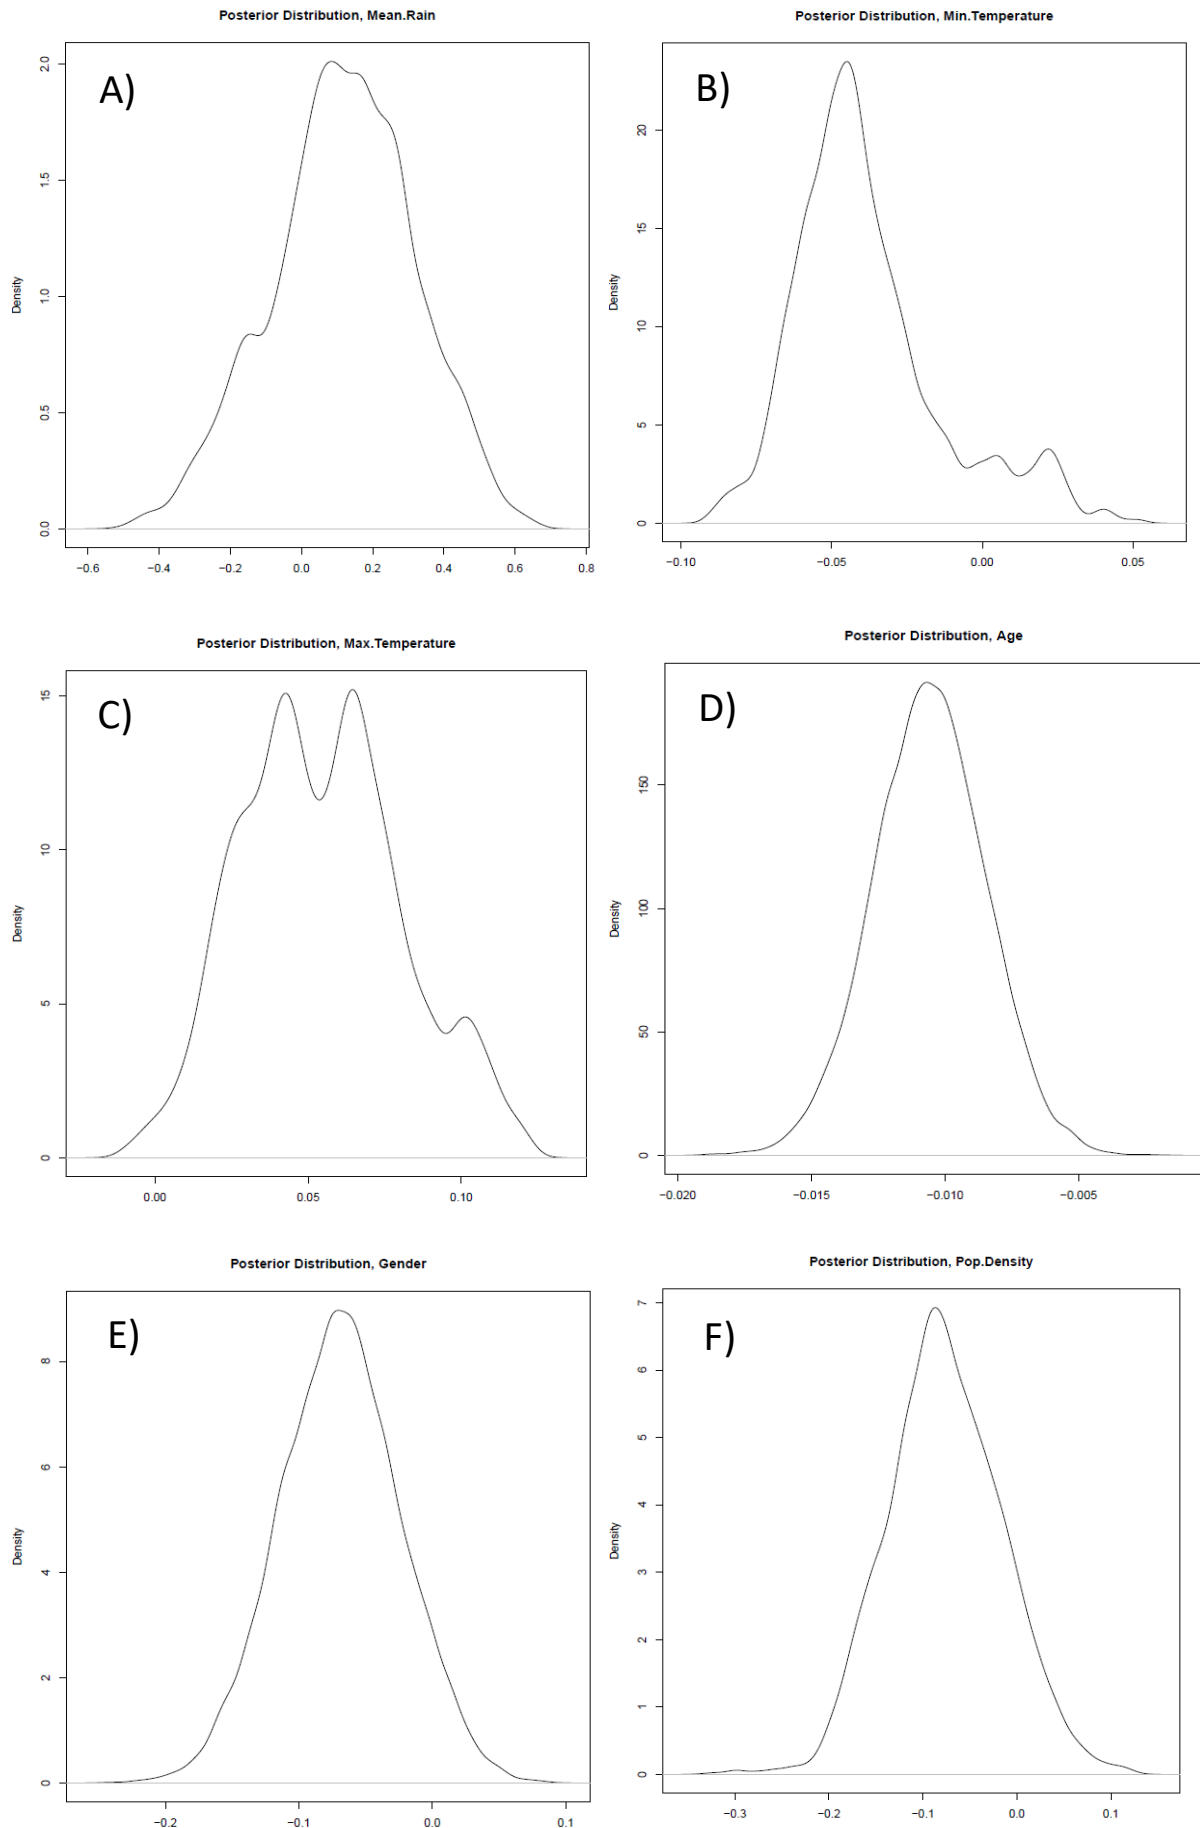

**Additional file 4.** Posterior distribution plots of A) Mean rainfall; B) Minimum temperature; C) Maximum temperature; D) Age; E) Gender; and F) Population density.
